# Supplementary material
Source: PubMed Central journal article supplement (PMC3184617)
Supplement: NIHMS319202-supplement-01.pdf [file NIHMS319202-supplement-01.pdf]

## Supplementary Data

Table S1. NMR experimntal parameters used in structure determination of TM1-TM2 in TFE:water(0.1% TFA) (1:1, v:v)

| NMR Experiment                                                                    | Complex Points                                                     | Sweep Width                                                           | Instrument |
|-----------------------------------------------------------------------------------|--------------------------------------------------------------------|-----------------------------------------------------------------------|------------|
| $^{15}\text{N}, ^1\text{H}$ -HSQC at 45°C                                         | 2048 ( $^1\text{H}$ )*256 ( $^{15}\text{N}$ )                      | 6010 ( $^1\text{H}$ )*900( $^{15}\text{N}$ )                          | 600 MHz    |
| $^{15}\text{N}, ^1\text{H}$ -HSQC at 25°C                                         | 4096 ( $^1\text{H}$ )*512 ( $^{15}\text{N}$ )                      | 6010 ( $^1\text{H}$ )*1500( $^{15}\text{N}$ )                         | 600 MHz    |
| NOESY- $^{15}\text{N}, ^1\text{H}$ -HSQC                                          | 2048( $^1\text{H}$ )*256( $^1\text{H}$ )*64( $^{15}\text{N}$ )     | 8012( $^1\text{H}$ )*6600( $^1\text{H}$ )*12068( $^{15}\text{N}$ )    | 600 MHz    |
| TOCSY- $^{15}\text{N}, ^1\text{H}$ -HSQC                                          | 5195( $^1\text{H}$ )*7299( $^{15}\text{N}$ )*2838( $^1\text{H}$ )  | 6010( $^1\text{H}$ )*6000( $^{13}\text{C}$ )*900( $^1\text{H}$ )      | 600 MHz    |
| HNCA                                                                              | 2048( $^1\text{H}$ )*512( $^{13}\text{C}$ )*128( $^{15}\text{N}$ ) | 6010( $^1\text{H}$ )*4526( $^{13}\text{C}$ )*900( $^{15}\text{N}$ )   | 600 MHz    |
| HNCACB                                                                            | 2048( $^1\text{H}$ )*512( $^{13}\text{C}$ )*128( $^{15}\text{N}$ ) | 6010( $^1\text{H}$ )*8000( $^{13}\text{C}$ )*900( $^{15}\text{N}$ )   | 600 MHz    |
| HN(CA)CO                                                                          | 2048( $^1\text{H}$ )*256( $^{13}\text{C}$ )*32( $^{15}\text{N}$ )  | 6010( $^1\text{H}$ )*2500( $^{13}\text{C}$ )*900( $^{15}\text{N}$ )   | 600 MHz    |
| HNCO                                                                              | 2048( $^1\text{H}$ )*512( $^{13}\text{C}$ )*128( $^{15}\text{N}$ ) | 6010( $^1\text{H}$ )*2000( $^{13}\text{C}$ )*900( $^{15}\text{N}$ )   | 600 MHz    |
| HCCH-TOCSY                                                                        | 2048( $^1\text{H}$ )*256( $^{13}\text{C}$ )*256( $^{15}\text{N}$ ) | 3613( $^1\text{H}$ )*3600( $^{13}\text{C}$ )*12001( $^{15}\text{N}$ ) | 600 MHz    |
| $^{13}\text{C}$ -edited TOCSY                                                     | 2048( $^1\text{H}$ )*256( $^{13}\text{C}$ )*512( $^{13}\text{C}$ ) | 7225( $^1\text{H}$ )*12019( $^{13}\text{C}$ )*1199( $^{13}\text{C}$ ) | 600 MHz    |
| $^{15}\text{N}$ -edited NOESY                                                     | 2048( $^1\text{H}$ )*256( $^{15}\text{N}$ )*256( $^1\text{H}$ )    | 8012( $^1\text{H}$ )*6000( $^{15}\text{N}$ )*10200( $^1\text{H}$ )    | 600 MHz    |
| NOESY (300 and 150 msec)                                                          | 256( $^1\text{H}$ )*2048( $^1\text{H}$ )                           | 6010( $^1\text{H}$ )                                                  | 600 MHz    |
| TOCSY (60 and 25 msec)                                                            | 256( $^1\text{H}$ )*2048( $^1\text{H}$ )                           | 6010( $^1\text{H}$ )                                                  | 600 MHz    |
| NOESY- $^{13}\text{C}, ^1\text{H}$ -HSQC                                          | 2048( $^1\text{H}$ )*256( $^1\text{H}$ )*256( $^{13}\text{C}$ )    | 8012( $^1\text{H}$ )*6000( $^1\text{H}$ )*10200                       | 600 MHz    |
| $^{15}\text{N}, ^1\text{H}$ -HSQC for T2 relaxation                               | 2048( $^1\text{H}$ )*512( $^{15}\text{N}$ )                        | 6009( $^1\text{H}$ )*900( $^{15}\text{N}$ )                           | 600 MHz    |
| NOE- $^{15}\text{N}, ^1\text{H}$ -HSQC                                            | 2048( $^1\text{H}$ )*256( $^{15}\text{N}$ )                        | 6010( $^1\text{H}$ )*900( $^{15}\text{N}$ )                           | 600 MHz    |
| $^{15}\text{N}, ^1\text{H}$ -HSQC for H-D exchange                                | 4096( $^1\text{H}$ )*512( $^{15}\text{N}$ )                        | 6010( $^1\text{H}$ )*1500( $^{15}\text{N}$ )                          | 600 MHz    |
| NOESY-ct- $^{13}\text{C}, ^1\text{H}$ -HSQC                                       | 256( $^1\text{H}$ )*128( $^{13}\text{C}$ )*128( $^1\text{H}$ )     | 8091( $^1\text{H}$ )*3622( $^{13}\text{C}$ )*3622( $^1\text{H}$ )     | 900 MHz    |
| ct- $^{13}\text{C}, ^1\text{H}$ -HSQC-NOESY-ct- $^{13}\text{C}, ^1\text{H}$ -HSQC | 1024( $^1\text{H}$ )*106( $^{13}\text{C}$ )*104( $^1\text{H}$ )    | 1796( $^1\text{H}$ )*3622( $^{13}\text{C}$ )*1800( $^1\text{H}$ )     | 900 MHz    |
| HMCMCBCANH_val/ile                                                                | 2048( $^1\text{H}$ )*40( $^{15}\text{N}$ )*36( $^{13}\text{C}$ )   | 9765( $^1\text{H}$ )*1998( $^{15}\text{N}$ )*2641( $^{13}\text{C}$ )  | 700 MHz    |
| HMCMCBCANH_leu                                                                    | 2048( $^1\text{H}$ )*40( $^{15}\text{N}$ )*60( $^{13}\text{C}$ )   | 9765( $^1\text{H}$ )*1998( $^{15}\text{N}$ )*2641( $^{13}\text{C}$ )  | 700 MHz    |
| ct- $^{13}\text{C}, ^1\text{H}$ -HSQC                                             | 2048( $^1\text{H}$ )*400( $^{13}\text{C}$ )                        | 9328( $^1\text{H}$ )*8803( $^{13}\text{C}$ )                          | 700 MHz    |

## Supplemental Figure S1.

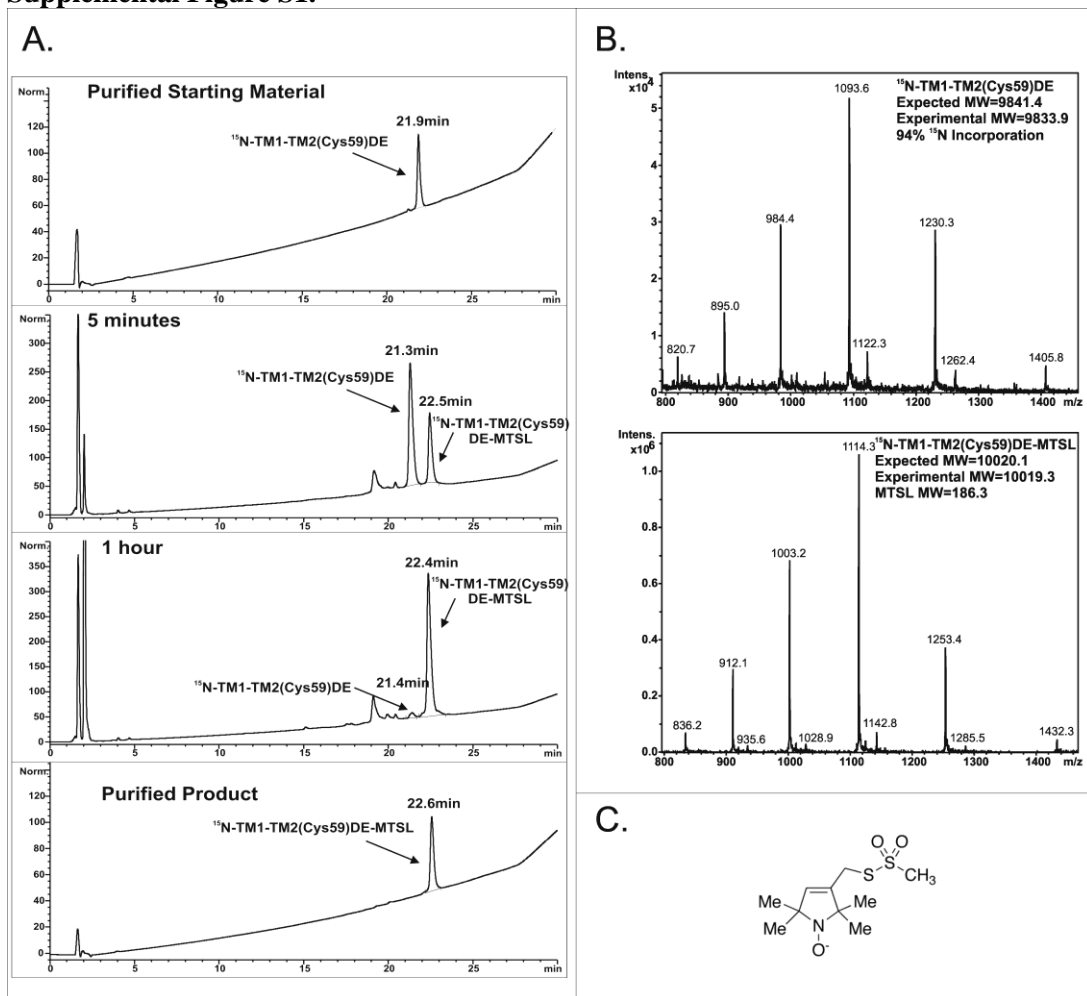

Supplemental Figure S1. Addition of the S-(2,2,5,5-tetramethyl-2,5-dihydro-1H-pyrrol-3-yl)methyl methanesulfonylthionate (MTSL) paramagnetic label. A) The labeling reaction of [ $^{15}\text{N}$ ]Met-His<sub>6</sub>-TM1-TM2-C59 with the paramagnetic spin label was performed in 6M GnHCl:TFE (1:1) with 10 mM MTSL. The reaction was followed over time by analytical RP-HPLC as described and the peaks were collected and analyzed by ESI-MS. B) The ESI-MS analysis for the starting material (top panel) and product of the labeling reaction (bottom panel). The MWs are given in each panel. C) The MTSL paramagnetic label.

Supplemental Figure S2:

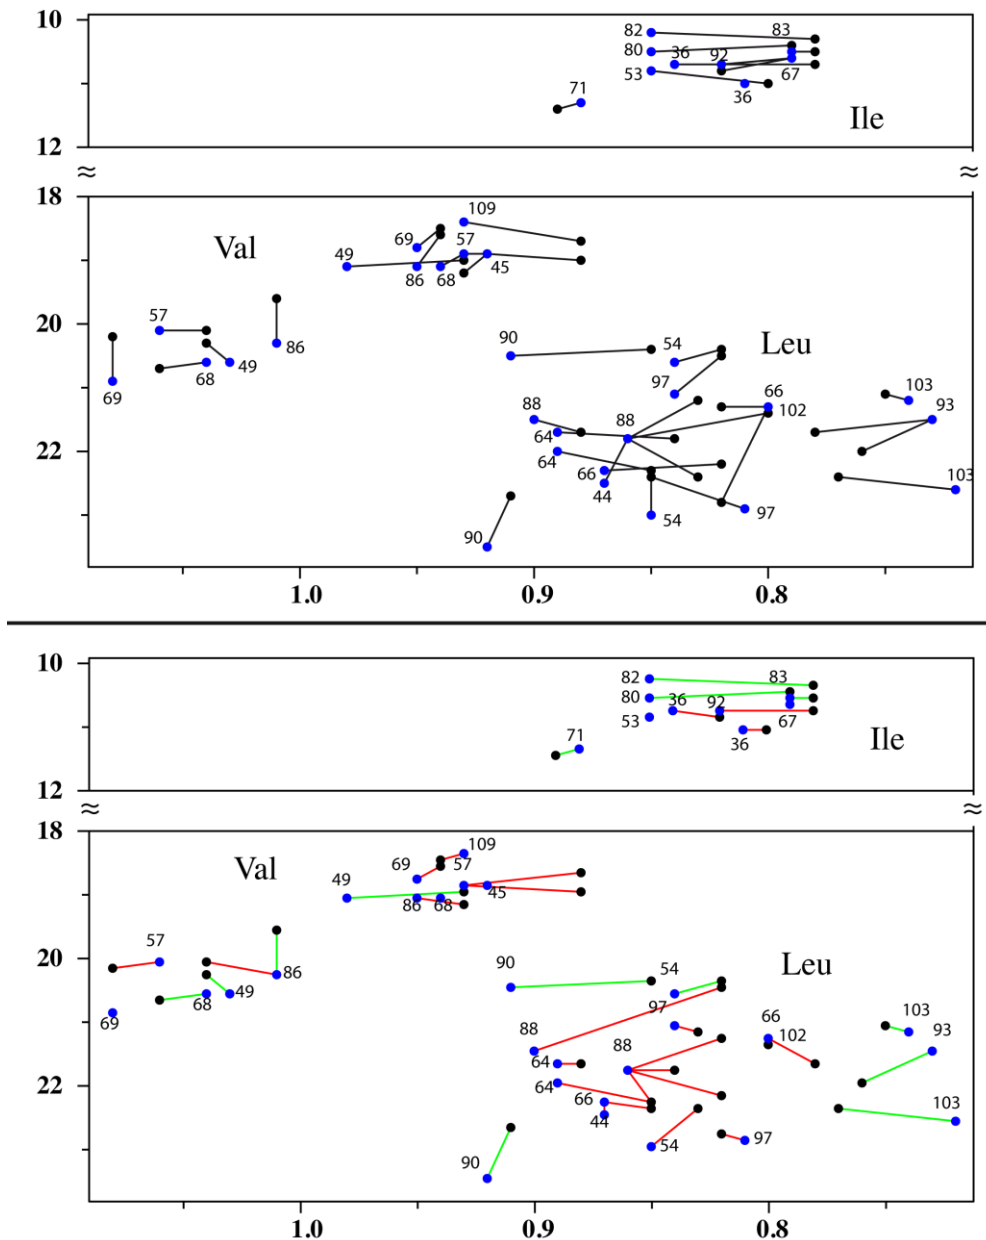

Supplemental Figure S2: Top: Correlation of  $^1\text{H}$  and  $^{13}\text{C}$  chemical shifts of [ $^{15}\text{N}, ^{13}\text{C}, ^2\text{H}(\text{H}(\text{methyl})\text{-ILV})$ ]-TM1-TM2 in TFE:water (black spheres) and LPPG (blue spheres). The assignments are annotated close to the TFE:water data. Bottom: Transfer of assignments by an automatic procedure (see text). Correct and erroneous transfers are indicated by green and red lines, respectively.
